# Supplementary material for: Changes in Microbial Community Structures under Reclaimed Water Replenishment Conditions
Source: MDPI journal article supplement (doi:10.3390/ijerph17041174), 2020-02-12
Supplement: s1 [file s1]

## Supplementary Materials

**Table S1.** Sample name and description.

| <b>Sample</b> | <b>Description</b>                                                 |
|---------------|--------------------------------------------------------------------|
| NW            | Natural water collected from the urban river                       |
| RW            | Reclaimed water collected from the reclaimed water treatment plant |
| 01A_RW        | 80% reclaimed water and 20% natural water from device A on day_01  |
| 10A_RW        | 80% reclaimed water and 20% natural water from device A on day_10  |
| 19A_RW        | 80% reclaimed water and 20% natural water from device A on day_19  |
| 28A_RW        | 80% reclaimed water and 20% natural water from device A on day_28  |
| 10B_NW        | 100% natural water from device B on day_10                         |
| 19B_NW        | 100% natural water from device B on day_19                         |
| 28B_NW        | 100% natural water from device B on day_28                         |
| 10C_RW        | 80% reclaimed water and 20% natural water from device C on day_10  |
| 19C_RW        | 80% reclaimed water and 20% natural water from device C on day_19  |
| 28C_RW        | 80% reclaimed water and 20% natural water from device C on day_28  |
| NF            | Natural biofilms collected from the urban river                    |
| 10A_NF        | Natural biofilms from device A on day_10                           |
| 19A_NF        | Natural biofilms from device A on day_19                           |
| 28A_NF        | Natural biofilms from device A on day_28                           |
| 10A_PF        | Primary biofilms from device A on day_10                           |
| 19A_PF        | Primary biofilms from device A on day_19                           |
| 28A_PF        | Primary biofilms from device A on day_28                           |
| 10B_NF        | Natural biofilms from device B on day_10                           |
| 19B_NF        | Natural biofilms from device B on day_19                           |
| 28B_NF        | Natural biofilms from device B on day_28                           |
| 10C_NF        | Natural biofilms from device C on day_10                           |
| 19C_NF        | Natural biofilms from device C on day_19                           |
| 28C_NF        | Natural biofilms from device C on day_28                           |

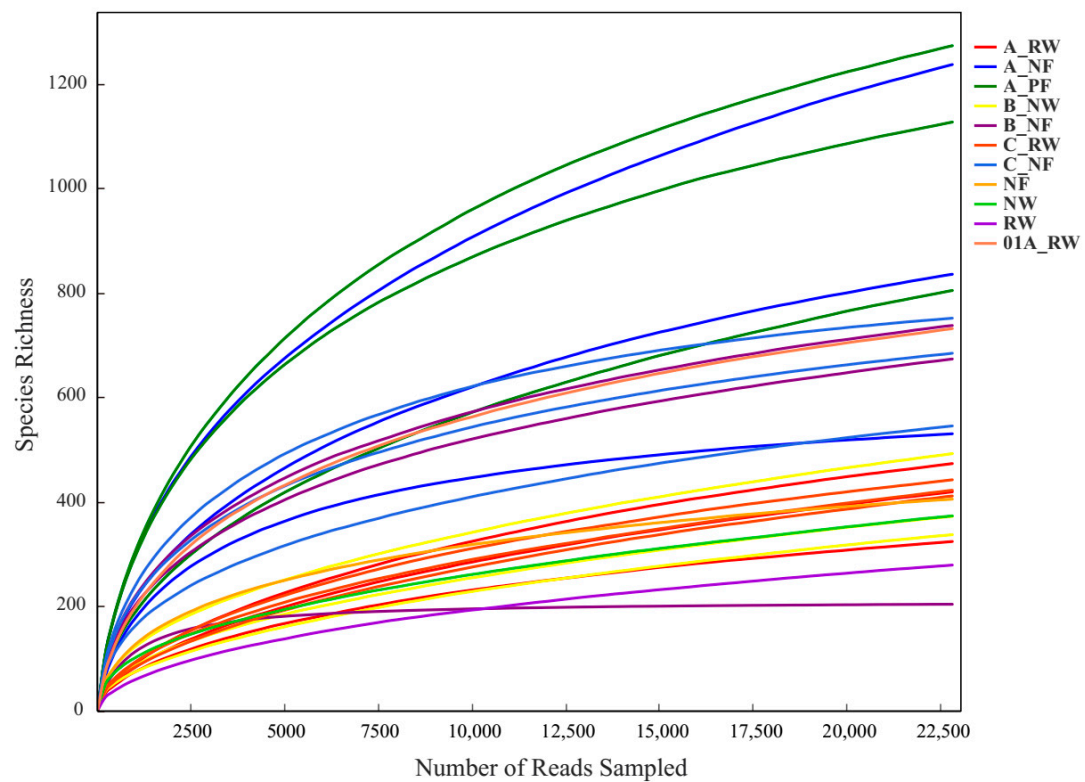

**Figure S1.** Rarefaction curve of water and biofilm samples.
